# Supplementary material for: Understanding the magnetization blocking mechanism in N23−-radical-bridged dilanthanide single-molecule magnets
Source: Royal Society of Chemistry journal article supplement (doi:10.1039/d1cp00452b), 2021-01-01
Supplement: d1cp00452b2.pdf [file d1cp00452b2.pdf]

Supporting information for “Understanding the magnetic blocking  
mechanism in  $\text{N}_2^{3-}$ -radical-bridged dilanthanide single-molecule magnets”

Giang T. Nguyen, and Liviu Ungur

Department of Chemistry, Faculty of Science, National University of Singapore, Block S8 Level 3, 3  
Science Drive 3 Singapore 117543

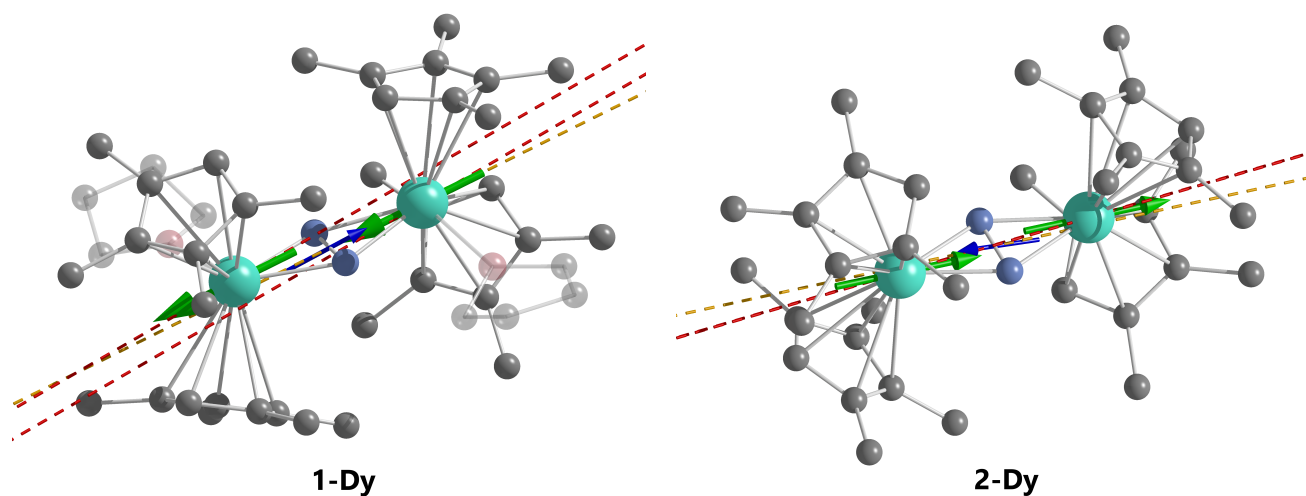

Figure S1: Molecular structure of **1-Tb** (left) and **2-Tb** (right). Cyan, blue, red and gray spheres illustrate Tb, N, O and C atoms, respectively. Hydrogen atoms are omitted and THF groups are faded for clarity. Red dash line indicates magnetic anisotropy axis of the ground doublet on each Ln ion while the yellow one is for the ground exchange doublet. Green and blue arrows demonstrate magnetic moments of the Ln ions and the radical, respectively.

Table S1: Contribution of local CF doublet on each lanthanide center to exchange doublet for **1-Tb** (only the contribution larger or equal to 5% is reported).

| Local CF doublet | Exchange doublet |     |     |     |     |     |
|------------------|------------------|-----|-----|-----|-----|-----|
|                  | 1                | 2   | 3   | 4   | 5   | 6   |
| $ \pm 6\rangle$  | 94%              | 49% | 85% | 85% | 50% | 46% |
| $ \pm 5\rangle$  | 6%               | 50% | 14% | 15% | 49% | 8%  |
| $ \pm 4\rangle$  |                  |     |     |     |     | 42% |
| $ \pm 3\rangle$  |                  |     |     |     |     |     |
| $ \pm 2\rangle$  |                  |     |     |     |     |     |
| $ \pm 1\rangle$  |                  |     |     |     |     |     |
| $ 0\rangle$      |                  |     |     |     |     |     |

Table S2: Contribution of local CF doublet on each lanthanide center to exchange doublet for **1-Dy** (only the contribution larger or equal to 5% is reported).

| Local CF doublets  | Exchange doublet |     |     |     |     |     |
|--------------------|------------------|-----|-----|-----|-----|-----|
|                    | 1                | 2   | 3   | 4   | 5   | 6   |
| $ \pm 15/2\rangle$ | 97%              | 98% | 98% | 95% | 50% | 54% |
| $ \pm 13/2\rangle$ |                  |     |     |     | 48% | 44% |
| $ \pm 11/2\rangle$ |                  |     |     |     |     |     |
| $ \pm 9/2\rangle$  |                  |     |     |     |     |     |
| $ \pm 7/2\rangle$  |                  |     |     |     |     |     |
| $ \pm 5/2\rangle$  |                  |     |     |     |     |     |
| $ \pm 3/2\rangle$  |                  |     |     |     |     |     |
| $ \pm 1/2\rangle$  |                  |     |     |     |     |     |

Table S3: Contribution of local CF doublet on each lanthanide center to exchange doublet for **2-Tb** (only the contribution larger or equal to 5% is reported).

| Local CF doublet | Exchange doublet |     |     |     |     |     |
|------------------|------------------|-----|-----|-----|-----|-----|
|                  | 1                | 2   | 3   | 4   | 5   | 6   |
| $ \pm 6\rangle$  | 98%              | 95% | 95% | 49% | 50% | 52% |
| $ \pm 5\rangle$  |                  | 5 % | 5%  | 51% | 49% | 47% |
| $ \pm 4\rangle$  |                  |     |     |     |     |     |
| $ \pm 3\rangle$  |                  |     |     |     |     |     |
| $ \pm 2\rangle$  |                  |     |     |     |     |     |
| $ \pm 1\rangle$  |                  |     |     |     |     |     |
| $ 0\rangle$      |                  |     |     |     |     |     |

Table S4: Contribution of local CF doublet on each lanthanide center to exchange doublet for **2-Dy** (only the contribution larger or equal to 5% is reported).

| Local CF doublet   | Exchange doublet |     |     |     |     |     |
|--------------------|------------------|-----|-----|-----|-----|-----|
|                    | 1                | 2   | 3   | 4   | 5   | 6   |
| $ \pm 15/2\rangle$ | 96%              | 96% | 96% | 50% | 49% | 49% |
| $ \pm 13/2\rangle$ |                  |     |     | 37% | 37% | 34% |
| $ \pm 11/2\rangle$ |                  |     |     | 11% | 11% | 10% |
| $ \pm 9/2\rangle$  |                  |     |     |     |     | 5%  |
| $ \pm 7/2\rangle$  |                  |     |     |     |     |     |
| $ \pm 5/2\rangle$  |                  |     |     |     |     |     |
| $ \pm 3/2\rangle$  |                  |     |     |     |     |     |
| $ \pm 1/2\rangle$  |                  |     |     |     |     |     |
